# Supplementary material for: Field calibration of polyurethane foam disk passive air samplers for PBDEs
Source: Royal Society of Chemistry journal article supplement (doi:10.1039/b903152a), 2009-01-01
Supplement: b903152a.pdf [file b903152a.pdf]

# 1 Supplementary Information

2 **Figure S1** Back trajectory of air mass sampled during the field sampling period at

3 Hazelrigg, Lancaster, United Kingdom

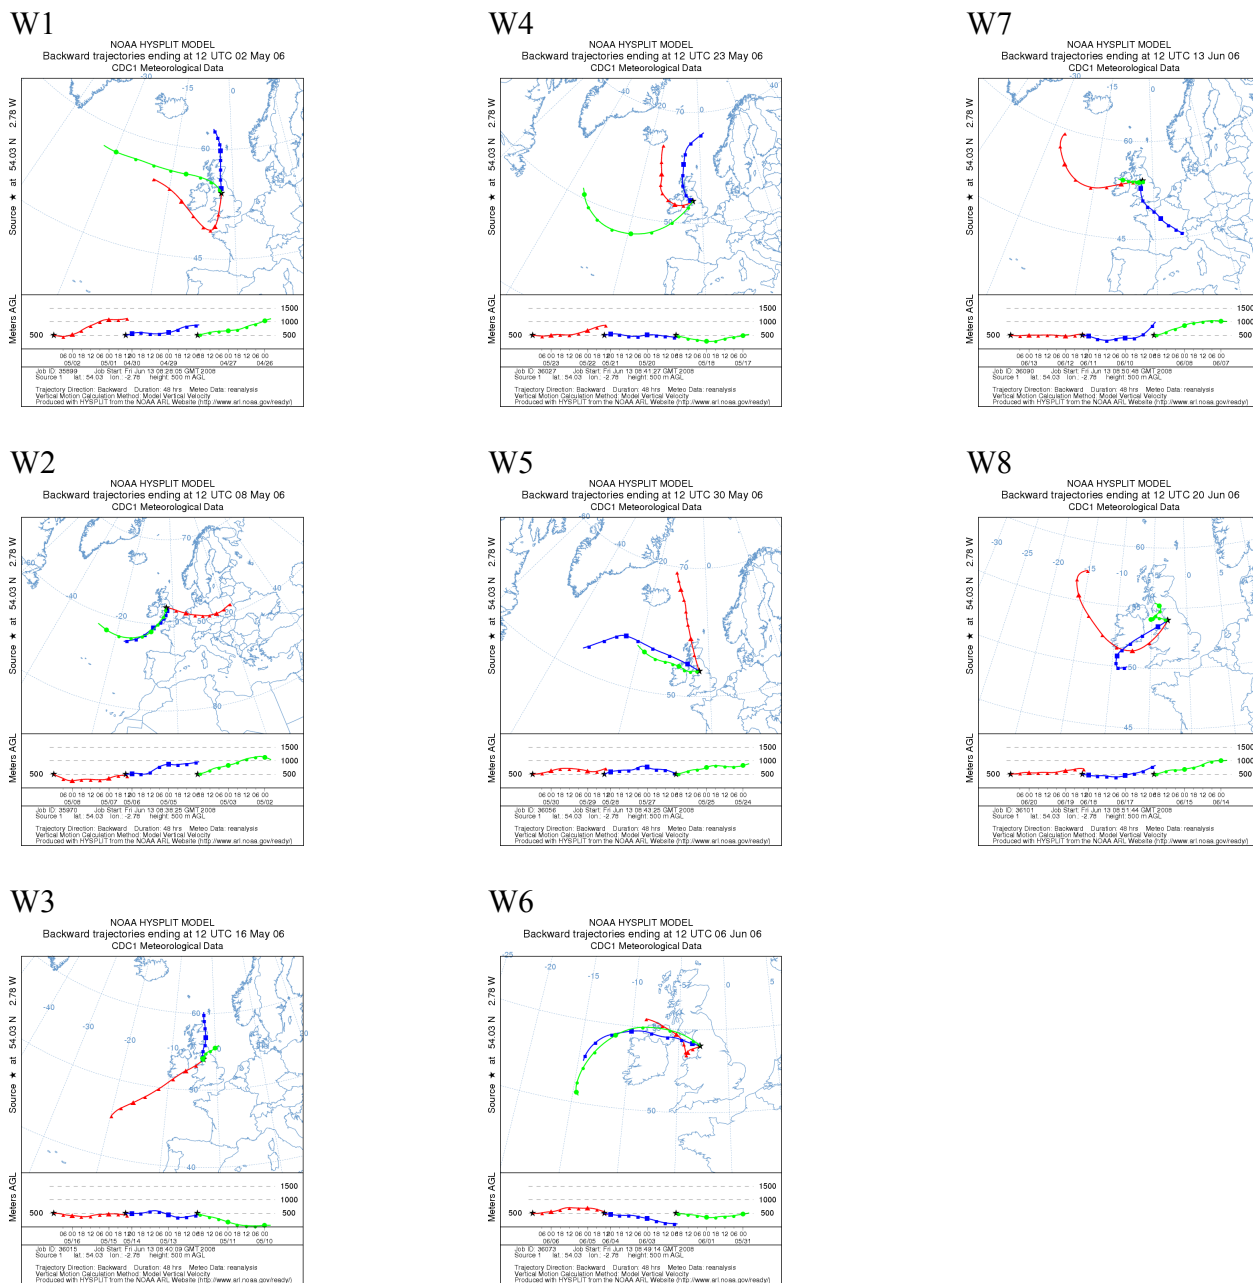

1 **Table S1** Recovery data and LOD (pg/m<sup>3</sup>) of BDEs in this study  
 2

| <b>Compound</b> | <b>Min (%)</b> | <b>Max (%)</b> | <b>Arithmetic<br/>mean (%)</b> | <b>Stdv</b> |
|-----------------|----------------|----------------|--------------------------------|-------------|
| 13C PCB 138     | 55             | 110            | 87                             | 10          |
| 13C PCB 153     | 60             | 110            | 89                             | 10          |
| 13C PCB 180     | 61             | 119            | 89                             | 10          |
| 13C PCB 209     | 49             | 105            | 83                             | 10          |
| BDE 51          | 51             | 91             | 70                             | 9.1         |
| BDE 128         | 50             | 111            | 78                             | 16          |
| BDE 190         | 20             | 127            | 70                             | 20          |
| <b>Compound</b> | <b>LOD</b>     |                |                                |             |
| BDE-17          | 1.3            |                |                                |             |
| BDE-28          | 0.40           |                |                                |             |
| BDE-47          | 1.3            |                |                                |             |
| BDE-49          | 0.15           |                |                                |             |
| BDE-99          | 2.1            |                |                                |             |
| BDE-100         | 0.56           |                |                                |             |
| BDE-138         | 2.0            |                |                                |             |
| BDE-153         | 0.70           |                |                                |             |
| BDE-154         | 1.2            |                |                                |             |
| BDE-183         | 2.8            |                |                                |             |

**Table S2** Percentage of particle size distribution (in unit of  $\mu\text{m}$ ) at sampling site (Hezelrigg) between 23 June and 14 July 2006

|                 | 0.30-0.40 | 0.40-0.50 | 0.50-0.65 | 0.65-0.80 | 0.80-1.0 | 1.0-1.6 | 1.6-2.0 | 2.0-3.0 | 3.0-4.0 | 4.0-5.0 | 5.0-7.5 | 7.5-10.0 | 10.0-15.0 | 15.0-20.0 | >20.0 |
|-----------------|-----------|-----------|-----------|-----------|----------|---------|---------|---------|---------|---------|---------|----------|-----------|-----------|-------|
| 23-Jun-06       | 65%       | 14%       | 10%       | 5%        | 3%       | 2%      | 1%      | 0%      | 0%      | 0%      | 0%      | 0%       | 0%        | 0%        | 0%    |
| 24-Jun-06       | 74%       | 13%       | 6%        | 3%        | 2%       | 1%      | 1%      | 0%      | 0%      | 0%      | 0%      | 0%       | 0%        | 0%        | 0%    |
| 25-Jun-06       | 73%       | 22%       | 4%        | 1%        | 0%       | 0%      | 0%      | 0%      | 0%      | 0%      | 0%      | 0%       | 0%        | 0%        | 0%    |
| 26-Jun-06       | 76%       | 17%       | 4%        | 2%        | 1%       | 1%      | 0%      | 0%      | 0%      | 0%      | 0%      | 0%       | 0%        | 0%        | 0%    |
| 27-Jun-06       | 76%       | 20%       | 3%        | 0%        | 0%       | 0%      | 0%      | 0%      | 0%      | 0%      | 0%      | 0%       | 0%        | 0%        | 0%    |
| 28-Jun-06       | 71%       | 24%       | 4%        | 0%        | 0%       | 0%      | 0%      | 0%      | 0%      | 0%      | 0%      | 0%       | 0%        | 0%        | 0%    |
| 29-Jun-06       | 76%       | 19%       | 4%        | 1%        | 0%       | 0%      | 0%      | 0%      | 0%      | 0%      | 0%      | 0%       | 0%        | 0%        | 0%    |
| 30-Jun-06       | 72%       | 22%       | 4%        | 1%        | 0%       | 0%      | 0%      | 0%      | 0%      | 0%      | 0%      | 0%       | 0%        | 0%        | 0%    |
| 1-Jul-06        | 76%       | 20%       | 3%        | 1%        | 0%       | 0%      | 0%      | 0%      | 0%      | 0%      | 0%      | 0%       | 0%        | 0%        | 0%    |
| 2-Jul-06        | 77%       | 19%       | 3%        | 0%        | 0%       | 0%      | 0%      | 0%      | 0%      | 0%      | 0%      | 0%       | 0%        | 0%        | 0%    |
| 3-Jul-06        | 79%       | 18%       | 3%        | 0%        | 0%       | 0%      | 0%      | 0%      | 0%      | 0%      | 0%      | 0%       | 0%        | 0%        | 0%    |
| 4-Jul-06        | 78%       | 18%       | 3%        | 0%        | 0%       | 0%      | 0%      | 0%      | 0%      | 0%      | 0%      | 0%       | 0%        | 0%        | 0%    |
| 5-Jul-06        | 79%       | 18%       | 3%        | 0%        | 0%       | 0%      | 0%      | 0%      | 0%      | 0%      | 0%      | 0%       | 0%        | 0%        | 0%    |
| 6-Jul-06        | 76%       | 20%       | 3%        | 0%        | 0%       | 0%      | 0%      | 0%      | 0%      | 0%      | 0%      | 0%       | 0%        | 0%        | 0%    |
| 7-Jul-06        | 68%       | 18%       | 7%        | 3%        | 2%       | 1%      | 0%      | 0%      | 0%      | 0%      | 0%      | 0%       | 0%        | 0%        | 0%    |
| 8-Jul-06        | 66%       | 16%       | 9%        | 4%        | 3%       | 1%      | 0%      | 0%      | 0%      | 0%      | 0%      | 0%       | 0%        | 0%        | 0%    |
| 9-Jul-06        | 64%       | 16%       | 10%       | 5%        | 3%       | 1%      | 1%      | 0%      | 0%      | 0%      | 0%      | 0%       | 0%        | 0%        | 0%    |
| 10-Jul-06       | 73%       | 15%       | 6%        | 3%        | 2%       | 1%      | 0%      | 0%      | 0%      | 0%      | 0%      | 0%       | 0%        | 0%        | 0%    |
| 11-Jul-06       | 57%       | 17%       | 13%       | 6%        | 4%       | 2%      | 1%      | 0%      | 0%      | 0%      | 0%      | 0%       | 0%        | 0%        | 0%    |
| 12-Jul-06       | 70%       | 18%       | 7%        | 3%        | 2%       | 1%      | 0%      | 0%      | 0%      | 0%      | 0%      | 0%       | 0%        | 0%        | 0%    |
| 13-Jul-06       | 55%       | 18%       | 14%       | 6%        | 3%       | 2%      | 1%      | 0%      | 0%      | 0%      | 0%      | 0%       | 0%        | 0%        | 0%    |
| 14-Jul-06       | 52%       | 19%       | 15%       | 7%        | 4%       | 2%      | 1%      | 0%      | 0%      | 0%      | 0%      | 0%       | 0%        | 0%        | 0%    |
| Arithmetic mean | 71%       | 18%       | 6%        | 2%        | 1%       | 1%      | 1%      | 0%      | 0%      | 0%      | 0%      | 0%       | 0%        | 0%        | 0%    |

6 **Table S3** A summary of concentrations of all analysed PBDEs in passive air samplers  
7 (unit: pg/m<sup>3</sup>)

8

|                | <i>Week 1</i> | <i>Week 2</i> | <i>Week 3</i> | <i>Week 4</i> | <i>Week 6</i> | <i>Week 8</i> |
|----------------|---------------|---------------|---------------|---------------|---------------|---------------|
| <b>BDE-17</b>  | 0.85          | 0.84          | 0.82          | 1.26          | 1.03          | 1.03          |
| <b>BDE-28</b>  | 0.47          | 0.51          | 0.86          | 0.52          | 0.89          | 1.17          |
| <b>BDE-47</b>  | 3.52          | 3.91          | 3.96          | 5.19          | 8.00          | 8.28          |
| <b>BDE-49</b>  | 0.56          | 0.60          | 0.58          | 1.00          | 1.04          | 1.03          |
| <b>BDE-99</b>  | 2.50          | 3.08          | 3.47          | 6.11          | 6.12          | 6.26          |
| <b>BDE-100</b> | 0.46          | 0.67          | 0.58          | 1.07          | 1.41          | 0.65          |
| <b>BDE-138</b> | 0.99          | 0.99          | 0.99          | 0.99          | 0.99          | 0.99          |
| <b>BDE-153</b> | 0.76          | 0.78          | 0.75          | 1.20          | 1.34          | 1.64          |
| <b>BDE-154</b> | 0.58          | 0.58          | 0.58          | 0.58          | 0.58          | 0.58          |
| <b>BDE-183</b> | 2.14          | 2.34          | 3.97          | 4.13          | 4.75          | 4.79          |

9

10 **Note:** BDE-138 and – 154 were detected in < 10% of the passive samplers, half of LODs

11 were used to represent the concentration in the table.

12  
13  
14

**Table S4** Meteorological information during sampling period

| Date       | Temperature (°C) | Wind Speed (m/s) | Rain (mm) |
|------------|------------------|------------------|-----------|
| 26/04/2006 | 18.5             | 4.6              | 0.0       |
| 27/04/2006 | 18.6             | 4.1              | 0.0       |
| 28/04/2006 | 18.2             | 3.5              | 0.0       |
| 29/04/2006 | 17.9             | 4.0              | 0.5       |
| 30/04/2006 | 16.8             | 3.4              | 7.3       |
| 01/05/2006 | 17.2             | 7.0              | 0.0       |
| 02/05/2006 | 18.4             | 10.5             | 0.4       |
| 03/05/2006 | 21.2             | 5.6              | 0.0       |
| 04/05/2006 | 19.8             | 9.4              | 1.2       |
| 05/05/2006 | 20.6             | 3.5              | 0.0       |
| 06/05/2006 | 20.8             | 6.1              | 2.0       |
| 07/05/2006 | 17.8             | 2.3              | 2.5       |
| 08/05/2006 | 18.9             | 8.2              | 0.4       |
| 09/05/2006 | 20.8             | 2.7              | 0.0       |
| 10/05/2006 | 23.4             | 3.5              | 0.0       |
| 11/05/2006 | 24.3             | 2.4              | 0.0       |
| 12/05/2006 | 24.1             | 2.5              | 6.7       |
| 13/05/2006 | 17.6             | 4.0              | 0.0       |
| 14/05/2006 | 16.3             | 5.6              | 4.4       |
| 15/05/2006 | 17.6             | 4.6              | 6.4       |
| 16/05/2006 | 20.4             | 3.4              | 0.3       |
| 17/05/2006 | 19.3             | 7.5              | 10.3      |
| 18/05/2006 | 20.3             | 10.3             | 11.0      |
| 19/05/2006 | 17.9             | 9.0              | 20.3      |
| 20/05/2006 | 16.9             | 4.2              | 1.2       |
| 21/05/2006 | 16.2             | 4.1              | 12.2      |
| 22/05/2006 | 15.7             | 6.9              | 1.7       |
| 23/05/2006 | 16.8             | 7.2              | 6.3       |
| 24/05/2006 | 17.5             | 8.0              | 0.0       |
| 25/05/2006 | 20.1             | 3.4              | 5.0       |
| 26/05/2006 | 17.8             | 6.3              | 0.9       |
| 27/05/2006 | 18.4             | 7.0              | 1.1       |
| 28/05/2006 | 18.4             | 7.0              | 1.1       |
| 29/05/2006 | 17.8             | 4.8              | 1.3       |
| 30/05/2006 | 19.5             | 4.5              | 0.0       |
| 31/05/2006 | 20.8             | 3.9              | 0.0       |
| 01/06/2006 | 20.6             | 6.0              | 0.0       |
| 02/06/2006 | 21.3             | 4.6              | 0.1       |
| 03/06/2006 | 23.0             | 3.6              | 0.0       |
| 04/06/2006 | 23.3             | 3.0              | 0.0       |
| 05/06/2006 | 23.2             | 2.4              | 0.0       |
| 06/06/2006 | 24.8             | 2.8              | 0.0       |
| 07/06/2006 | 25.6             | 2.8              | 0.0       |
| 08/06/2006 | 26.2             | 2.2              | 0.0       |
| 09/06/2006 | 26.6             | 7.0              | 0.0       |
| 10/06/2006 | 26.4             | 10.8             | 0.0       |
| 11/06/2006 | 27.3             | 3.8              | 8.1       |
| 12/06/2006 | 24.7             | 5.0              | 0.0       |
| 13/06/2006 | 23.0             | 3.7              | 0.0       |
| 14/06/2006 | 23.2             | 4.3              | 0.0       |
| 15/06/2006 | 24.2             | 2.7              | 0.0       |
| 16/06/2006 | 24.8             | 2.6              | 0.0       |
| 17/06/2006 | 26.4             | 2.1              | 0.0       |
| 18/06/2006 | 22.4             | 4.9              | 11.0      |
| 19/06/2006 | 21.6             | 6.1              | 0.3       |
| 20/06/2006 | 19.5             | 3.9              | 14.0      |

15

16 **Table S5** Statistical test of Sampler's Design Anova Test  
17

**Oneway**

[DataSet0]

**ANOVA**

concentration

|                | Sum of Squares | df | Mean Square | F    | Sig. |
|----------------|----------------|----|-------------|------|------|
| Between Groups | 5634.611       | 2  | 2817.305    | .796 | .494 |
| Within Groups  | 21241.923      | 6  | 3540.321    |      |      |
| Total          | 26876.534      | 8  |             |      |      |

18  
19  
20
